# Supplementary material for: Modeling the binding of diverse ligands within the Ah receptor ligand binding domain
Source: Springer Nature journal article supplement (doi:10.1038/s41598-019-47138-z), 2019-07-23
Supplement: 41598_2019_47138_MOESM1_ESM.pdf [file 41598_2019_47138_MOESM1_ESM.pdf]

## **Modeling the binding of diverse ligands within the Ah receptor ligand binding domain**

Sara Giani Tagliabue, Samantha C. Faber, Stefano Motta, Michael S. Denison, and Laura Bonati\*

**Supplementary information**

**Table S1.** Relative affinity and potency of test chemicals determined in AhR ligand binding (AhR LB) and DNA binding (AhR DNAB) assays. The relative potency of each test chemical for AhR ligand binding ( $IC_{50}$ ) and transformation/DNA binding ( $EC_{50}$ ) was determined from concentration-inhibition or concentration-response curves obtained using [ $^3H$ ]TCDD ligand binding and gel retardation analysis, respectively, as described under Materials and Methods. The mean  $IC_{50}/EC_{50} \pm$  standard deviation was determined using three-parameter non-linear regression with nine independent reactions.

| <b>Ligand id</b> | <b>AhR LB<br/><math>IC_{50}</math> [M]</b> | <b>AhR LB<br/>SD [M]</b> | <b>AhR LB<br/>-Log<math>IC_{50}</math></b> | <b>AhR DNAB<br/><math>EC_{50}</math> [M]</b> | <b>AhR DNAB<br/>SD [M]</b> | <b>AhR DNAB<br/>-Log<math>EC_{50}</math></b> |
|------------------|--------------------------------------------|--------------------------|--------------------------------------------|----------------------------------------------|----------------------------|----------------------------------------------|
| TCDD             | 1.00E-09                                   | -                        | 9.00                                       | 7.53E-09                                     | 1.10E-09                   | 8.12                                         |
| TCDF             | 2.01E-08                                   | 2.24E-09                 | 7.70                                       | 4.55E-09                                     | 5.37E-10                   | 8.34                                         |
| PCB126           | 5.89E-09                                   | 3.29E-09                 | 8.23                                       | 6.51E-09                                     | 9.45E-10                   | 8.19                                         |
| BaP              | 6.17E-07                                   | 8.41E-08                 | 6.21                                       | 3.89E-08                                     | 4.65E-09                   | 7.41                                         |
| 3MC              | 1.58E-09                                   | 1.27E-09                 | 8.80                                       | 6.00E-09                                     | 4.87E-10                   | 8.22                                         |
| DBA              | 7.60E-09                                   | 4.20E-09                 | 8.12                                       | 4.02E-09                                     | 3.80E-10                   | 8.40                                         |
| BNF              | 7.24E-09                                   | 2.30E-09                 | 8.14                                       | 1.38E-07                                     | 3.06E-08                   | 6.86                                         |
| FICZ             | 1.02E-09                                   | 7.86E-10                 | 8.99                                       | 4.25E-09                                     | 5.85E-10                   | 8.37                                         |
| IR               | 2.17E-09                                   | 1.02E-09                 | 8.66                                       | 2.39E-08                                     | 9.90E-09                   | 7.62                                         |
| LEFL             | 2.19E-06                                   | 1.03E-06                 | 5.66                                       | 2.68E-05                                     | 1.75E-06                   | 4.57                                         |

**Table S2.** DOPE score and validation scores of PROCHECK and ProSA for the mAhR models

| <b>model</b> | <b>DOPE score</b> | <b>PROCHECK<br/>G-factor*</b> | <b>ProSA<br/>Z-Score**</b> |
|--------------|-------------------|-------------------------------|----------------------------|
| AhR-4zp4     | -1146.24          | -0.15                         | -3.57                      |
| AhR-3f1p     | -1222.75          | -0.14                         | -4.11                      |
| AhR-3h82     | -1216.72          | -0.30                         | -4.10                      |
| AhR-3f1n     | -1213.07          | -0.19                         | -4.03                      |
| AhR-4gs9     | -1192.83          | -0.25                         | -4.23                      |
| AhR-3f1o     | -1186.26          | -0.26                         | -4.11                      |
| AhR-4ghi     | -1160.52          | -0.35                         | -4.13                      |
| AhR-4ghi.2   | -1159.28          | -0.35                         | -3.98                      |
| AhR-3h7w     | -1283.28          | -0.22                         | -4.27                      |
| AhR-4zqd     | -1153.25          | -0.24                         | -3.57                      |
| AhR-4xt2     | -1187.60          | -0.36                         | -3.59                      |

\* PROCHECK G-factor values are “normal” if  $\geq -0.5$

\*\* ProSA normal Z-score ranges between -7.5 and 0

**Table S3.** Comparison of the internal cavity volumes (calculated by CASTp) in the HIF-2 $\alpha$  template structures and in the mAhR models

| <b>PDB id</b> | <b>template<br/>volume (<math>\text{\AA}^3</math>)</b> | <b>ligand<br/>id</b> | <b>model name</b> | <b>model<br/>volume (<math>\text{\AA}^3</math>)</b> |
|---------------|--------------------------------------------------------|----------------------|-------------------|-----------------------------------------------------|
| 4zp4          | 375                                                    | water                | AhR-4zp4          | 417                                                 |
| 3f1p          | 364                                                    | water                | AhR-3f1p          | 478                                                 |
| 3h82          | 439                                                    | 020                  | AhR-3h82          | 489                                                 |
| 3f1n          | 383                                                    | EDO                  | AhR-3f1n          | 491                                                 |
| 4gs9          | 424                                                    | 0XB                  | AhR-4gs9          | 533                                                 |
| 3f1o          | 425                                                    | 2XY                  | AhR-3f1o          | 568                                                 |
| 4ghi          | 443                                                    | 0X3                  | AhR-4ghi          | 575                                                 |
| 4ghi          | 443                                                    | 0X3                  | AhR-4ghi.2        | 629                                                 |
| 3h7w          | 421                                                    | 018                  | AhR-3h7w          | 689                                                 |
| 4zqd          | 569                                                    | 0X3                  | AhR-4zqd          | 712                                                 |
| 4xt2          | 561                                                    | 43L                  | AhR-4xt2          | 808                                                 |

**Table S4.** XP Glide Score and Prime MM-GBSA  $\Delta G_{\text{bind(NS)}}$  for all the docking poses. The two selected representative poses are highlighted in light-gray

| ligand | model      | XP Glide Score | MM-GBSA $\Delta G_{\text{bind(NS)}}$ | ligand   | model      | XP Glide Score | MM-GBSA $\Delta G_{\text{bind(NS)}}$ |
|--------|------------|----------------|--------------------------------------|----------|------------|----------------|--------------------------------------|
| TCDD   | AhR-4ghi   | -7,9           | -90,1                                | BNF      | AhR-4ghi.2 | -7,5           | -83,0                                |
|        | AhR-3h7w   | -7,3           | -88,8                                |          | AhR-4gs9   | -8,3           | -82,3                                |
|        | AhR-3h7w   | -7,3           | -88,5                                |          | AhR-4zqd   | -8,8           | -79,9                                |
|        | AhR-4xt2   | -6,9           | -85,9                                |          | AhR-3h7w   | -8,7           | -76,0                                |
|        | AhR-4xt2   | -6,9           | -85,5                                |          | AhR-4xt2   | -8,2           | -74,3                                |
|        | AhR-3f1o   | -4,9           | -85,3                                |          | AhR-4ghi   | -7,1           | -72,5                                |
|        | AhR-3f1o   | -4,9           | -85,3                                |          | AhR-3f1o   | -6,5           | -69,4                                |
| TCDF   | AhR-4gs9   | -7,5           | -93,4                                | FICZ     | AhR-4ghi   | -10,1          | -74,7                                |
|        | AhR-4xt2   | -6,1           | -91,4                                |          | AhR-3h7w   | -8,1           | -74,0                                |
|        | AhR-4ghi   | -8,5           | -90,0                                |          | AhR-4xt2   | -7,8           | -70,2                                |
|        | AhR-4zqd   | -7,6           | -86,5                                | AhR-4zqd | -7,5       | -68,5          |                                      |
|        | AhR-3h7w   | -7,1           | -86,1                                | IR trans | AhR-4zqd   | -7,0           | -72,4                                |
|        | AhR-3f1o   | -6,2           | -81,6                                |          | AhR-4gs9   | -6,9           | -71,7                                |
| PCB126 | AhR-4ghi.2 | -8,5           | -104,1                               | AhR-3h7w | -8,0       | -67,7          |                                      |
|        | AhR-4gs9   | -7,4           | -103,7                               | AhR-3f1o | -6,3       | -67,5          |                                      |
|        | AhR-4ghi   | -8,1           | -99,0                                | AhR-4xt2 | -7,5       | -65,7          |                                      |
|        | AhR-4zqd   | -7,5           | -97,0                                | AhR-4ghi | -6,9       | -60,7          |                                      |
|        | AhR-3h7w   | -7,4           | -95,8                                | LEFL     | AhR-3f1n   | -5,7           | -79,3                                |
|        | AhR-4xt2   | -6,6           | -92,6                                |          | AhR-4gs9   | -6,4           | -70,9                                |
|        | AhR-3f1o   | -4,7           | -89,8                                |          | AhR-4ghi.2 | -6,3           | -69,5                                |
| BaP    | AhR-4ghi.2 | -7,4           | -74,3                                | AhR-4ghi | -9,1       | -68,1          |                                      |
|        | AhR-3h7w   | -8,8           | -71,9                                | AhR-4zp4 | -4,9       | -65,5          |                                      |
|        | AhR-4zqd   | -7,6           | -69,6                                | AhR-3h82 | -8,1       | -64,8          |                                      |
|        | AhR-4xt2   | -6,5           | -67,1                                | AhR-4zqd | -7,4       | -63,1          |                                      |
| 3MC    | AhR-4zqd   | -8,3           | -86,8                                | AhR-3h7w | -5,6       | -59,9          |                                      |
|        | AhR-3h7w   | -7,9           | -83,5                                | AhR-4xt2 | -5,4       | -55,2          |                                      |
|        | AhR-4xt2   | -7,5           | -79,4                                | AhR-3f1o | -6,0       | -53,2          |                                      |
| DBA    | AhR-4gs9   | -8,6           | -86,8                                |          |            |                |                                      |
|        | AhR-4zqd   | -8,4           | -84,1                                |          |            |                |                                      |
|        | AhR-4ghi   | -8,3           | -83,3                                |          |            |                |                                      |
|        | AhR-3h7w   | -9,2           | -82,2                                |          |            |                |                                      |
|        | AhR-4xt2   | -8,8           | -78,7                                |          |            |                |                                      |

**Table S5.** MM-GBSA  $\Delta G_{\text{bind}}$  mean values in the last 8 ns of MD simulations for the selected docking poses. The pose with the lowest  $\Delta G_{\text{bind}}$  value is highlighted in light gray

| <b>ligand</b> | <b><math>\Delta G_{\text{bind}}</math> mean<br/>[kcal·mol<sup>-1</sup>]</b> | <b>sd<br/>[kcal·mol<sup>-1</sup>]</b> |
|---------------|-----------------------------------------------------------------------------|---------------------------------------|
| TCDD-3h7w     | -36.8                                                                       | 1.9                                   |
| TCDD-4ghi     | -34.8                                                                       | 1.8                                   |
| TCDF-4ghi     | -34.0                                                                       | 1.8                                   |
| TCDF-4gs9     | -32.7                                                                       | 1.9                                   |
| PCB126-4ghi.2 | -38.0                                                                       | 2.0                                   |
| PCB126-4xt2   | -36.1                                                                       | 1.9                                   |
| BaP-4ghi.2    | -34.7                                                                       | 2.3                                   |
| BaP-3h7w      | -30.0                                                                       | 2.1                                   |
| 3MC-4zqd      | -38.3                                                                       | 3.0                                   |
| 3MC-4xt2      | -31.0                                                                       | 2.3                                   |
| DBA-4gs9      | -37.6                                                                       | 2.6                                   |
| DBA-4ghi      | -34.1                                                                       | 1.9                                   |
| BNF-3h7w      | -38.7                                                                       | 2.0                                   |
| BNF-4ghi.2    | -37.0                                                                       | 2.4                                   |
| FICZ-4ghi     | -40.4                                                                       | 2.3                                   |
| FICZ-4xt2     | -35.9                                                                       | 3                                     |
| IR trans-4zqd | -39.5                                                                       | 3.0                                   |
| IR trans-4ghi | -34.0                                                                       | 4.0                                   |
| LEFL-3f1n     | -36.6                                                                       | 2.0                                   |
| LEFL-4gs9     | -31.0                                                                       | 2.0                                   |

**Table S6.** Relative ligand binding affinity of test chemicals for mutant AhRs. The relative affinity ( $IC_{50}$ ) of each test chemical for the AhR ligand was determined from concentration-dependent inhibition curves obtained using [ $^3H$ ]TCDD ligand binding analysis, as described under Materials and Methods. The mean  $IC_{50} \pm$  standard deviation was determined using three-parameter non-linear regression with nine independent reactions.

| AhR Mutant | AhR Ligand | $IC_{50}$ [M] | SD [M]        | $-\text{Log}IC_{50}$ |
|------------|------------|---------------|---------------|----------------------|
| P291L      | TCDF       | 4.35E-11      | 2.20E-10      | 10.36                |
|            | BaP        | 6.04E-07      | 1.82E-07      | 6.22                 |
| M342A      | 3MC        | 2.48E-07      | 2.93E-08      | 6.61                 |
|            | PCB126     | 9.33E-09      | 1.76E-07      | 8.03                 |
|            | DBA        | 6.72E-09      | 1.13E-08      | 8.17                 |
|            | BNF        | 9.60E-09      | 4.38E-09      | 8.02                 |
|            | FICZ       | 2.07E-11      | 5.86E-11      | 10.68                |
|            | IR         | 1.26E-08      | 4.60E-09      | 7.90                 |
|            | LEFL       | 9.03E-09      | 2.74E-08      | 8.04                 |
|            | 3MC        | 3.47E-08      | 1.74E-08      | 7.46                 |
| M334A      | PCB126     | 7.41E-08      | 5.79E-09      | 7.13                 |
|            | DBA        | 7.33E-09      | 1.56E-08      | 8.13                 |
| H331A      | 3MC        | 1.41E-10      | 3.83E-11      | 9.85                 |
| S330A      | LEFL       | 6.29E-06      | 1.64E-06      | 5.20                 |
| S359A      | BNF        | 4.71E-08      | 3.75E-10      | 7.33                 |
|            | FICZ       | 4.10E-09      | 1.30E-09      | 8.39                 |
|            | IR         | 9.20E-08      | 1.98E-09      | 7.04                 |
|            | LEFL       | non-converged | non-converged | non-converged        |
| C327A      | DBA        | 1.46E-08      | 3.15E-09      | 7.83                 |
|            | BNF        | 4.05E-08      | 8.92E-09      | 7.39                 |
|            | FICZ       | 4.32E-09      | 2.59E-08      | 8.36                 |
|            | IR         | 7.58E-09      | 2.16E-08      | 8.12                 |

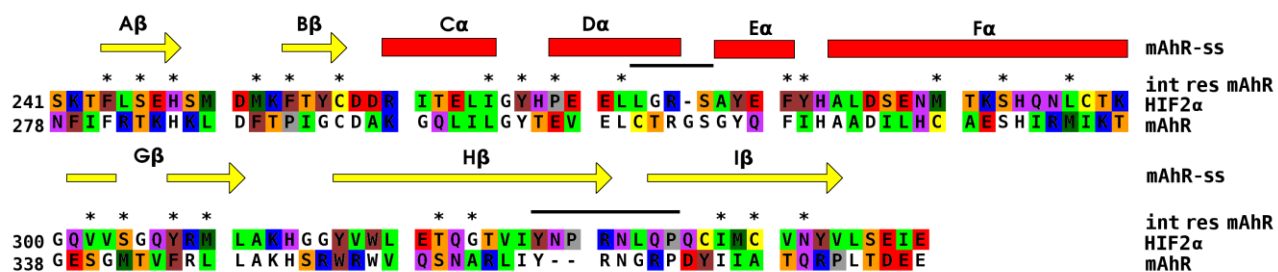

**Figure S1.** Sequence alignment between HIF-2 $\alpha$  and mAhR used for Homology Modeling. Human HIF-2 $\alpha$  sequence: Uniprot ID: Q99814, residues: 241-349; mAhR: Uniprot ID: P30561, residues 278-384). Amino acid residues are colored by physicochemical properties, secondary structures attributed by DSSPcont to the AhR-3h7w model are reported. Internal residues are marked by asterisks and residues subjected to loop-modeling refinement (D $\alpha$ -E $\alpha$ : 310-314 and H $\beta$ -I $\beta$ : 365-370) are underlined.

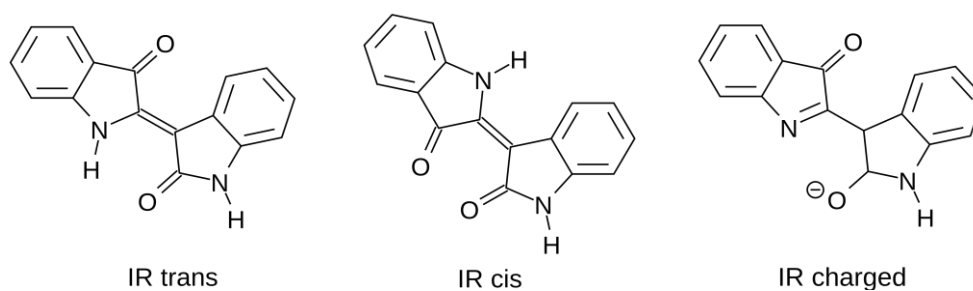

**Figure S2.** The three possible forms of IR at pH = 7 found by Epik.



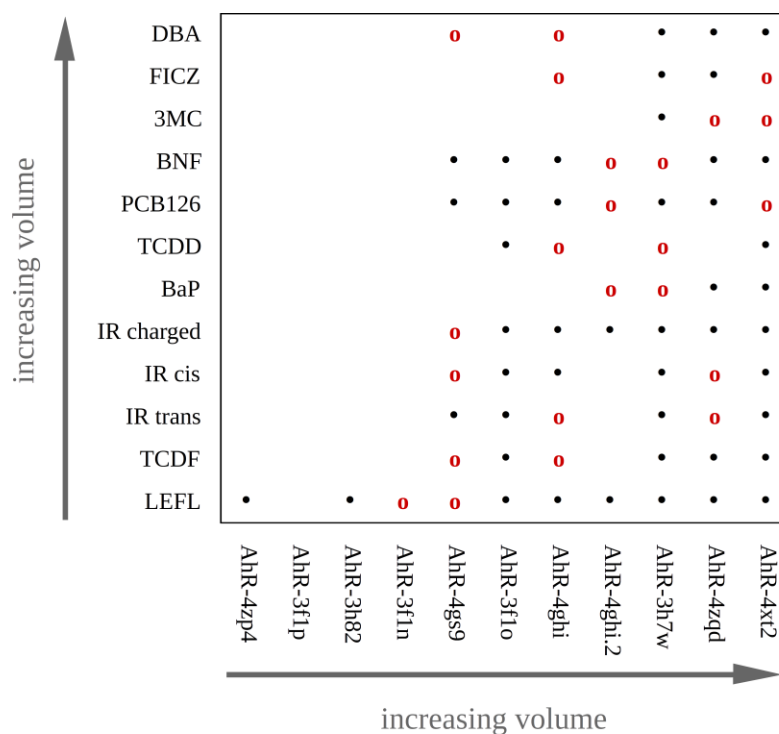

**Figure S3.** Docking matrix; each symbol indicates that a pose was found for that ligand in that model. Red circles stand for the two poses chosen as representative of the binding mode variability of each ligand. Ligands and cavities are ordered by increasing occupancy or volume, respectively.

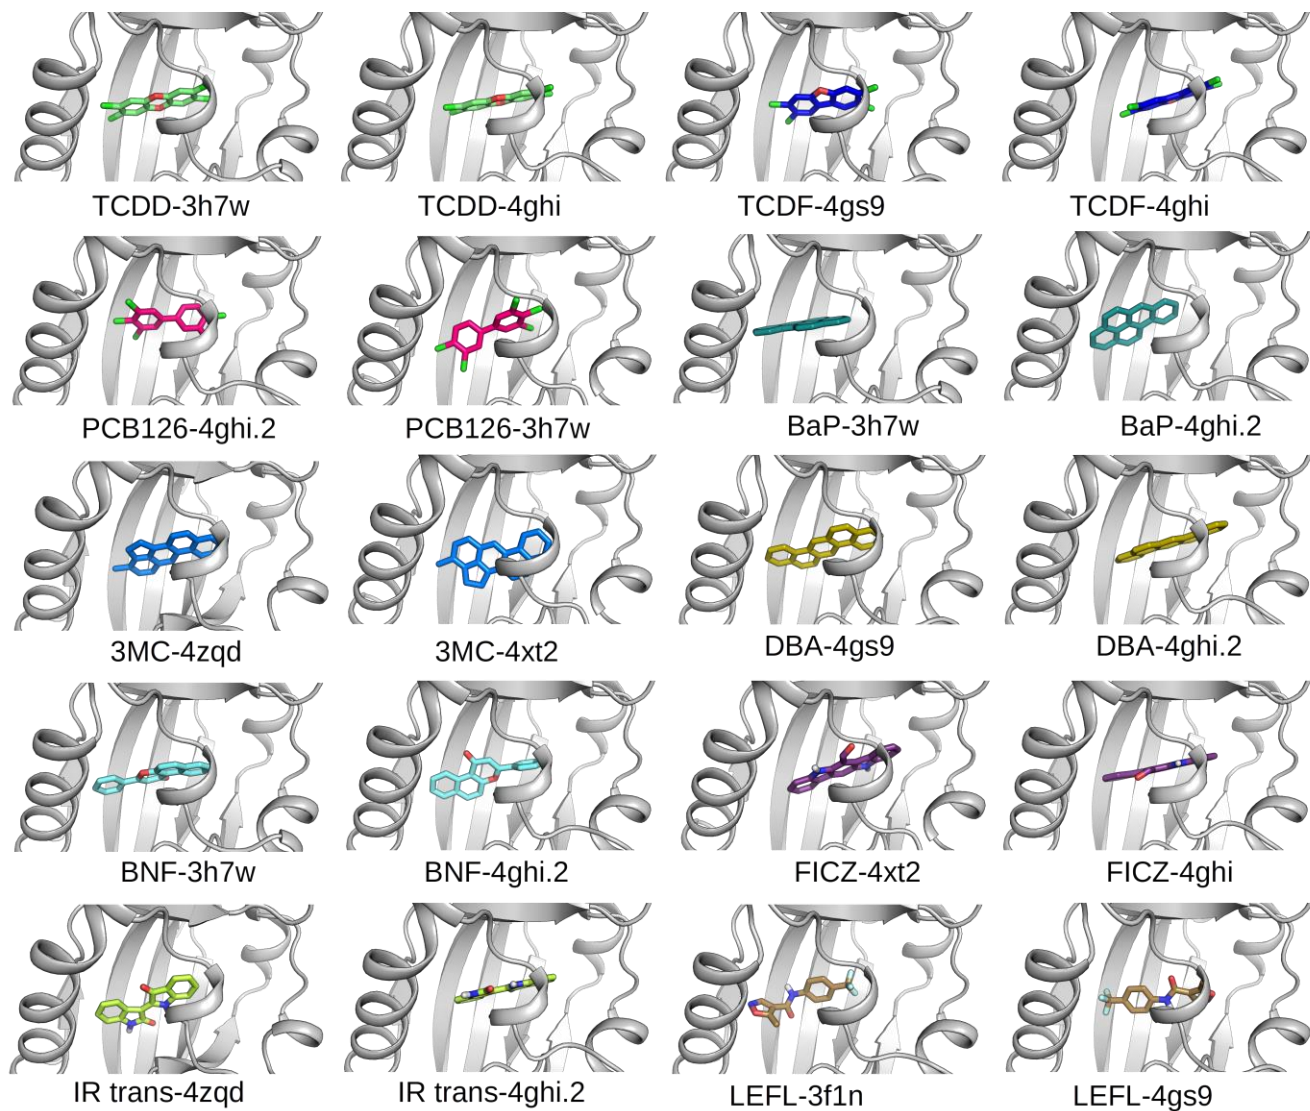

**Figure S4.** Three-dimensional representation of the two representative docking poses selected for each ligand. Protein is shown as cartoons, ligands as sticks.

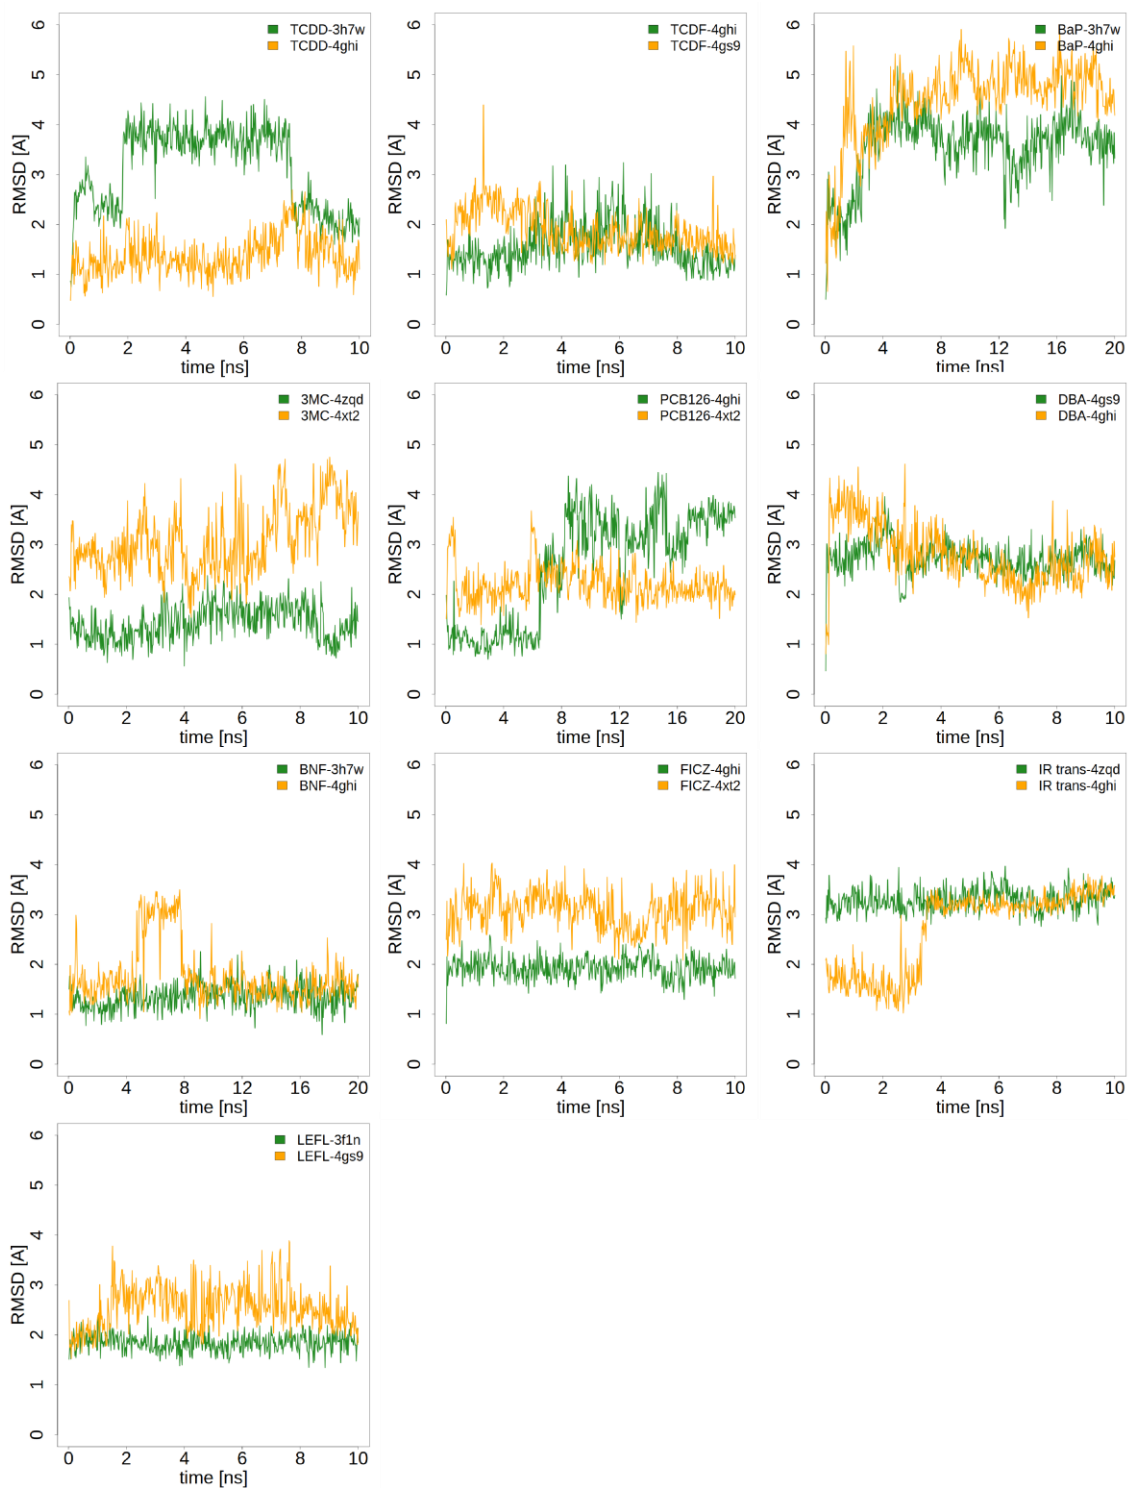

**Figure S5.** RMSD graphs in the MD simulations of the two representative poses of each ligand (the pose with the lowest  $\Delta G_{\text{bind}}$  is shown in green). RMSD is calculated against the initial docking pose.

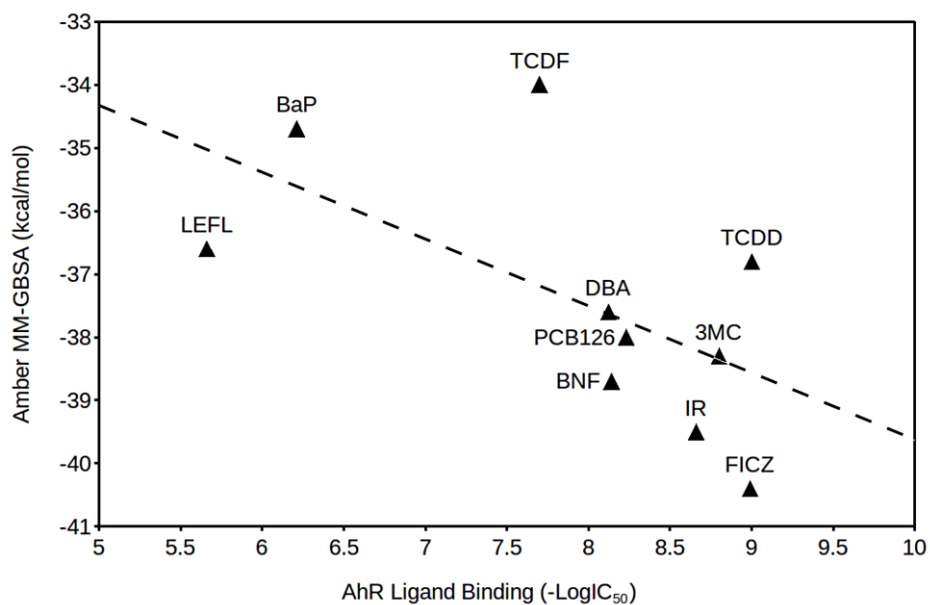

**Figure S6.** Correlation between the Amber MM-GBSA  $\Delta G_{\text{bind}}$  and the experimental binding affinity of each compound ( $-\text{LogIC}_{50}$ ). Pearson correlation coefficient  $R^2 = 0.37$ ; Spearman rank-order correlation  $\rho=0.64$  with 2-tail p-value=0.048.

### Group 1 Ligands

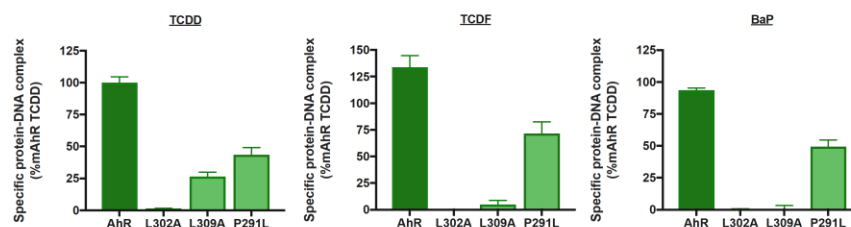

### Group 2 Ligands

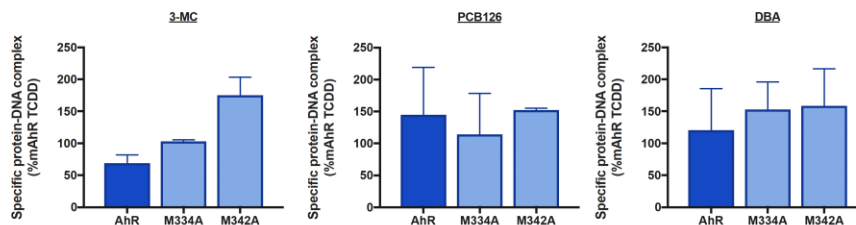

### Group 3 Ligands

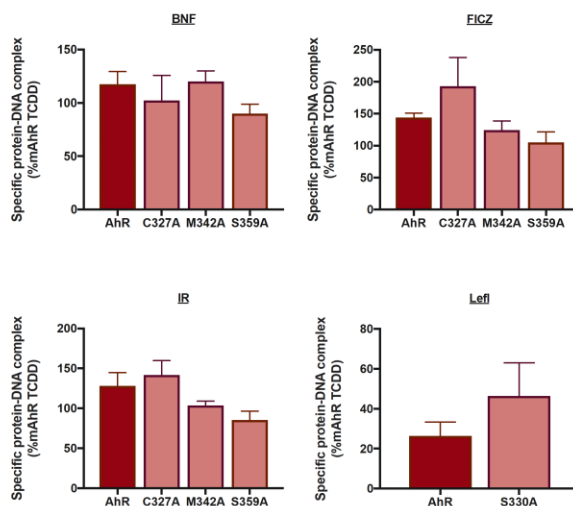

**Figure S7.** Relative ability of test chemicals to stimulate AhR transformation/DNA binding of wild-type and mutant AhRs. Single concentrations of AhR ligands were used to assess AhR transformation/DNA binding measured as specific protein-DNA complex (% mAhR TCDD) by Gel Retardation Analysis as described in the Material and Methods section. Maximal concentrations of AhR ligands were used and include BNF (10  $\mu$ M), BaP (10 $\mu$ M), 3MC (10  $\mu$ M), IR (1  $\mu$ M), DBA (10  $\mu$ M), FICZ (1  $\mu$ M), PCB126 (100 nM), LEFL (100  $\mu$ M), TCDD (20 nM), and TCDF (100 nM). Values represent the Three-parameter non-linear regression performed with nine independent reactions for mean specific protein-DNA complex (%mAhR TCDD)  $\pm$  standard deviation of two independent reactions.
